# Supplementary material for: Controlled growth of a nanoplatelet-structured copper sulfide thin film as a highly efficient counter electrode for quantum dot-sensitized solar cells
Source: Royal Society of Chemistry journal article supplement (doi:10.1039/c6ra08375g), 2016-01-01
Supplement: c6ra08375g1.pdf [file c6ra08375g1.pdf]

## **Supporting Information (SI†)**

### **Controlled growth of nanoplatelet-structured copper sulfide thin film as a highly efficient counter electrode for quantum dot-sensitized solar cells**

Mallineni Venkata-Haritha, Chandu V.V.M. Gopi, Lee Young-Seok and Hee-Je Kim\*

*School of Electrical Engineering, Pusan National University, Busandaehak-ro 63beon-gil, Geumjeong-gu, Busan, 46241, South Korea*

\*Corresponding authors. Tel.: +82 51 510 2364; fax: +82 51 513 0212

E-mail: [heeje@pusan.ac.kr](mailto:heeje@pusan.ac.kr) (H.-J. Kim)

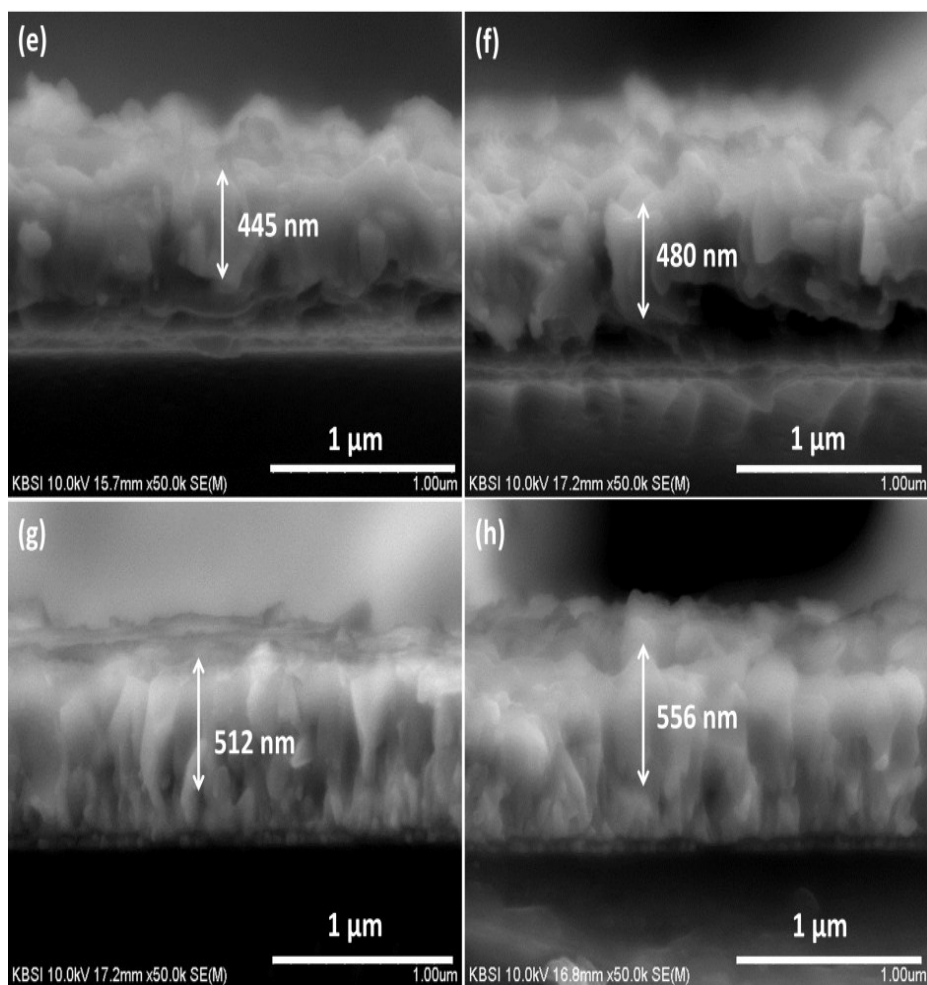

**Fig. S1.** SEM cross sectional images of the CuS CE of (a) 0.2M-CuS, (b) 0.4M-CuS, (c) 0.6M-CuS, and (d) 0.8M-CuS on FTO substrate.

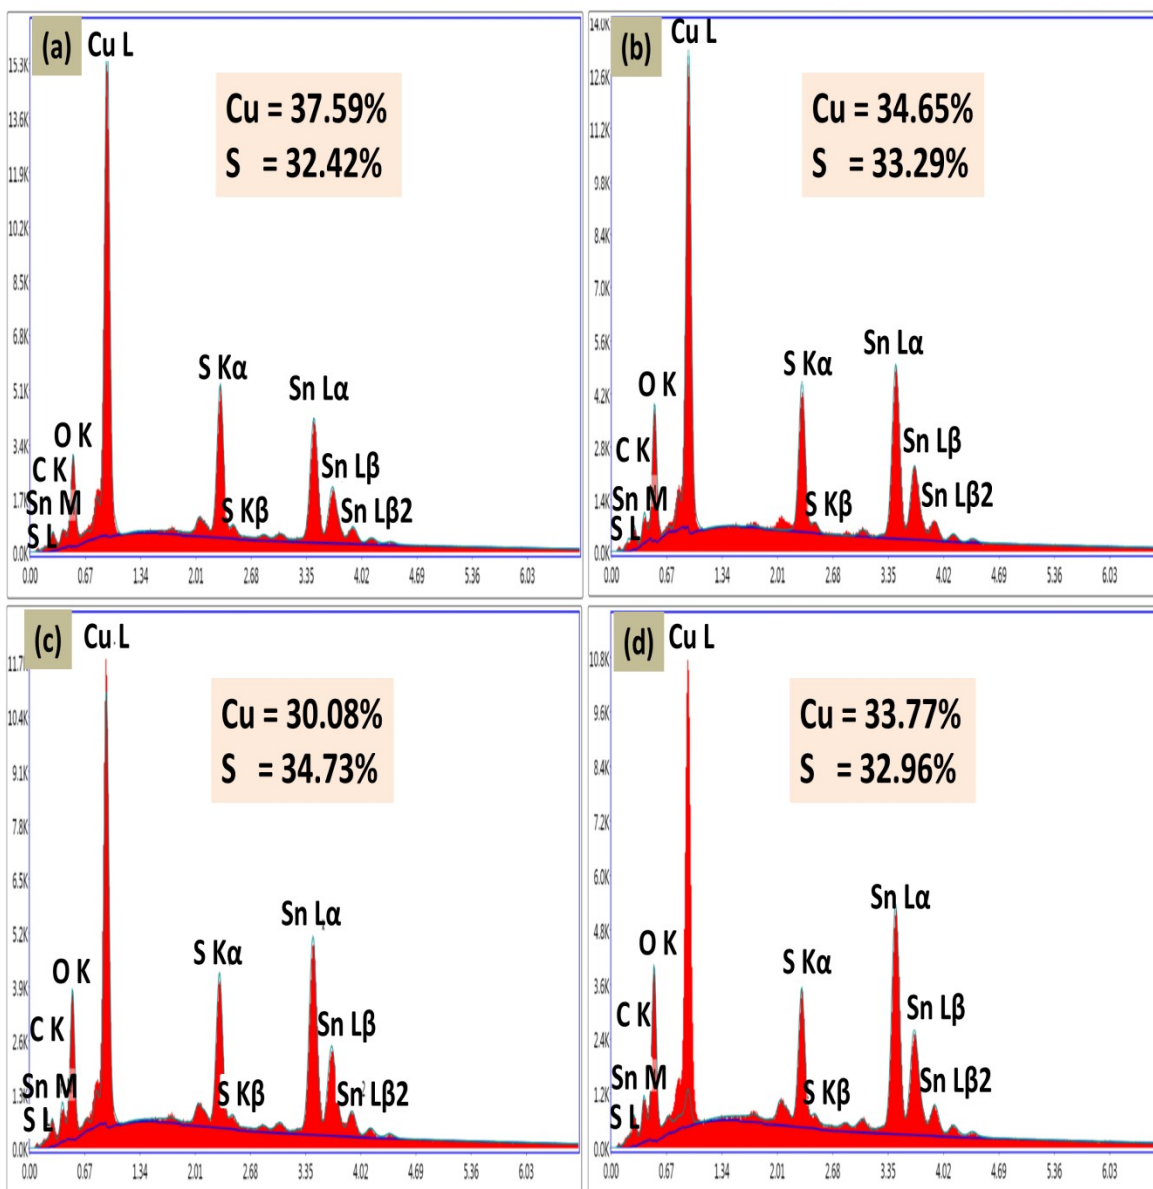

**Fig. S2.** EDX analysis of (a) 0.2M-CuS, (b) 0.4M-CuS, (c) 0.6M-CuS, and (d) 0.8M-CuS thin films on FTO substrate.
